# Supplementary material for: Three metal complexes derived from 3-methyl-1H-pyrazole-4-carboxylic acid: synthesis, crystal structures, luminescence and electrocatalytic properties
Source: Royal Society of Chemistry journal article supplement (doi:10.1039/c6ra10989f), 2016-01-01
Supplement: c6ra10989f1.pdf [file c6ra10989f1.pdf]

## Electronic Supplementary Information (ESI)

### Three Metal Complexes Derived from 3-Methyl-1-*H*-Pyrazole-4-Carboxylic Acid: Synthesis, Crystal Structures, Luminescence and Electrocatalytic Properties

Jing Liu,<sup>a,b</sup> Mei-Ling Cheng,<sup>a</sup> Li-Li Yu,<sup>a</sup> Sheng-Chun Chen,<sup>a</sup> Yong-Liang Shao,<sup>c</sup> Qi Liu,<sup>\*,a,d</sup> Chang-Wei Zai<sup>a</sup> and Feng-Xiang Yin<sup>\*b</sup>

<sup>a</sup>School of Petrochemical Engineering and Jiangsu Key Laboratory of Advanced Catalytic Materials and Technology, Changzhou University, Changzhou, 213164, P. R. China.

<sup>b</sup>Changzhou Institute of Advanced Materials, Beijing University of Chemical Technology, Changzhou, 213164, P. R. China.

<sup>c</sup>Department of Chemistry, Lanzhou University, Lanzhou, 730000, P. R. China.

<sup>d</sup>State Key Laboratory of Coordination Chemistry, Nanjing University, Nanjing, 210093, P. R. China.

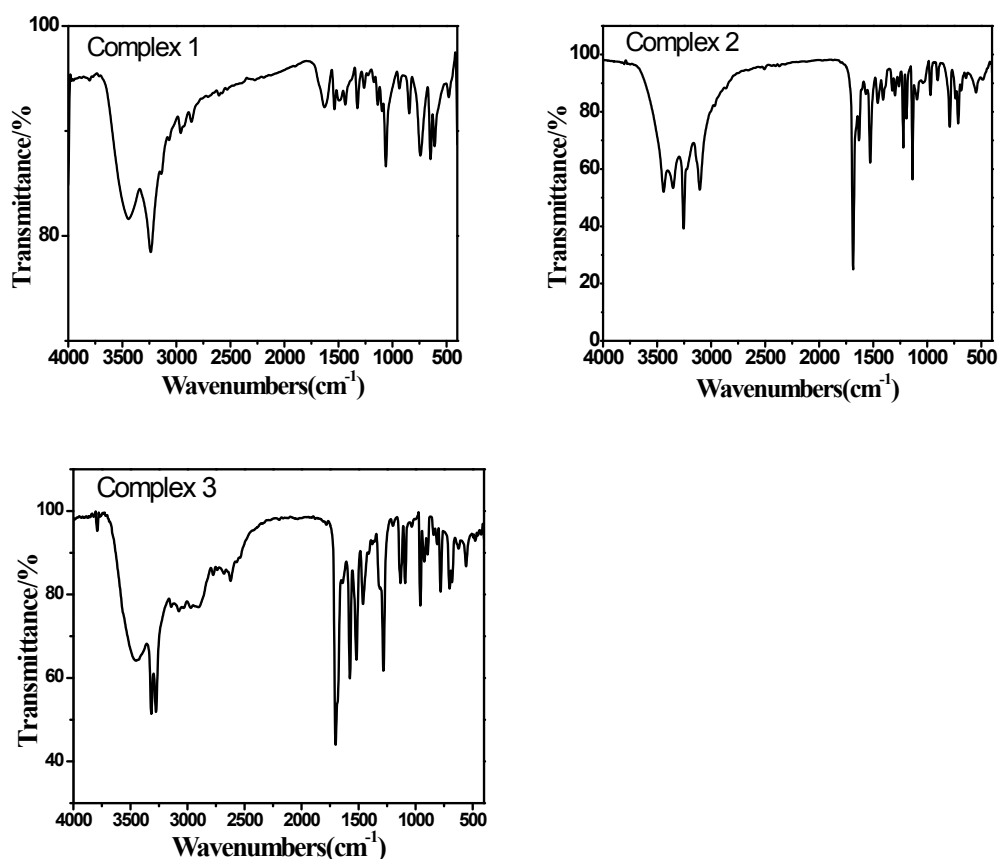

Fig. S1: The IR spectra of complexes 1-3

**Crystallographic data:**

The crystallographic data for the complexes **1-3** can be obtained free of charge at [www.ccdc.cam.ac.uk/conts/retrieving.html](http://www.ccdc.cam.ac.uk/conts/retrieving.html), or from the Cambridge Crystallographic Data Center, 12 Union Road, Cambridge CB2 1EZ, UK; Fax: (internet) þ 44-1223/336-033; E-mail: [deposit@ccdc.cam.ac.uk](mailto:deposit@ccdc.cam.ac.uk). The CCDC numbers of complexes **1-3** are 977149, 1003672, 1003671 respectively.

**Table S1.** Selected bond lengths (Å) and angles (°) of complex **1, 2** and **3**.

| <b>Complex 1</b>                        |            |                                      |            |
|-----------------------------------------|------------|--------------------------------------|------------|
| Cd1—O3                                  | 2.320 (4)  | Cd1—N1 <sup>i</sup>                  | 2.298 (4)  |
| Cd1—O3 <sup>i</sup>                     | 2.320 (4)  | Cd1—O4                               | 2.297 (4)  |
| Cd1—N1                                  | 2.298 (4)  | Cd1—O4 <sup>i</sup>                  | 2.297 (4)  |
| O3—Cd1—O3 <sup>i</sup>                  | 180.0      | O4 <sup>i</sup> —Cd1—N1 <sup>i</sup> | 89.43 (16) |
| N1 <sup>i</sup> —Cd1—O3 <sup>i</sup>    | 90.00 (14) | O4—Cd1—N1                            | 89.43 (16) |
| N1—Cd1—O3 <sup>i</sup>                  | 90.00 (14) | O4 <sup>i</sup> —Cd1—N1              | 90.57 (16) |
| N1 <sup>i</sup> —Cd1—O3                 | 90.00 (14) | O4 <sup>i</sup> —Cd1—O4              | 180.0      |
| N1—Cd1—O3                               | 90.00 (14) | O4—Cd1—O3                            | 85.0 (2)   |
| N1—Cd1—N1 <sup>i</sup>                  | 180.0      | O4 <sup>i</sup> —Cd1—O3              | 95.0 (2)   |
| Symmetry code: (i) $-x, -y, -z$ .       |            |                                      |            |
| <b>Complex 2</b>                        |            |                                      |            |
| Co1—O3                                  | 2.089 (4)  | Co1—O4                               | 2.096 (4)  |
| Co1—O3 <sup>i</sup>                     | 2.089 (4)  | Co1—N1 <sup>i</sup>                  | 2.126 (5)  |
| Co1—O4 <sup>i</sup>                     | 2.096 (4)  | Co1—N1                               | 2.126 (5)  |
| O3—Co1—O3 <sup>i</sup>                  | 180.00 (1) | O4 <sup>i</sup> —Co1—N1 <sup>i</sup> | 89.37 (18) |
| O3—Co1—O4 <sup>i</sup>                  | 93.70 (18) | O4—Co1—N1 <sup>i</sup>               | 90.63 (18) |
| O3 <sup>i</sup> —Co1—O4 <sup>i</sup>    | 86.30 (18) | O4 <sup>i</sup> —Co1—N1              | 90.63 (18) |
| O3—Co1—O4                               | 86.30 (18) | O4—Co1—N1                            | 89.37 (18) |
| O3 <sup>i</sup> —Co1—O4                 | 93.70 (18) | N1 <sup>i</sup> —Co1—N1              | 180.00(1)  |
| O3 <sup>i</sup> —Co1—N1                 | 90.23 (18) | O3—Co1—N1 <sup>i</sup>               | 90.23 (18) |
| O4 <sup>i</sup> —Co1—O4                 | 180.00 (1) | O3—Co1—N1                            | 89.77 (18) |
| Symmetry code: (i) $-x+1, -y+1, -z+2$ . |            |                                      |            |
| <b>Complex 3</b>                        |            |                                      |            |
| Cd1—Cl3                                 | 2.653 (2)  | Cd1—N3                               | 2.286 (6)  |
| Cd1—O1                                  | 2.346 (5)  | Cd2—N1 <sup>v</sup>                  | 2.280 (5)  |

|                           |             |                                          |             |
|---------------------------|-------------|------------------------------------------|-------------|
| Cd1—O2                    | 2.418 (5)   | Cd2—Cl3 <sup>ii</sup>                    | 2.5920 (18) |
| Cd1—O4 <sup>i</sup>       | 2.221 (5)   | Cd2—O3 <sup>i</sup>                      | 2.455 (5)   |
| Cd1—O5                    | 2.372 (7)   |                                          |             |
| O1—Cd1—Cl3                | 88.91 (14)  | O3 <sup>i</sup> —Cd2—Cl3 <sup>ii</sup>   | 93.93 (14)  |
| O1—Cd1—O2                 | 54.91 (17)  | O3 <sup>iii</sup> —Cd2—O3 <sup>i</sup>   | 180.0       |
| O1—Cd1—O5                 | 89.1 (2)    | N1 <sup>v</sup> —Cd2—Cl3 <sup>ii</sup>   | 87.66 (16)  |
| O2—Cd1—Cl3                | 86.99 (14)  | N1 <sup>iv</sup> —Cd2—Cl3 <sup>ii</sup>  | 92.34 (16)  |
| O4 <sup>i</sup> —Cd1—Cl3  | 93.44 (16)  | N1 <sup>iv</sup> —Cd2—Cl3                | 87.66 (16)  |
| O4 <sup>i</sup> —Cd1—O1   | 150.2 (2)   | N1 <sup>iv</sup> —Cd2—O3 <sup>iii</sup>  | 86.53 (19)  |
| O4 <sup>i</sup> —Cd1—O2   | 95.5 (2)    | N1 <sup>v</sup> —Cd2—O3 <sup>iii</sup>   | 93.47 (19)  |
| O4 <sup>i</sup> —Cd1—O5   | 81.5 (2)    | N1 <sup>iv</sup> —Cd2—O3 <sup>i</sup>    | 93.47 (19)  |
| O4 <sup>i</sup> —Cd1—N3   | 121.1 (2)   | N1 <sup>v</sup> —Cd2—O3 <sup>i</sup>     | 86.53 (19)  |
| O5—Cd1—Cl3                | 166.1 (2)   | N1 <sup>iv</sup> —Cd2—N1 <sup>v</sup>    | 180.0       |
| O5—Cd1—O2                 | 80.6 (2)    | Cd2—Cl3—Cd1                              | 97.98 (6)   |
| N3—Cd1—Cl3                | 103.41 (16) | N3—Cd1—O1                                | 87.05 (19)  |
| N3—Cd1—O2                 | 140.69 (19) | N3—Cd1—O5                                | 90.3 (2)    |
| Cl3—Cd2—Cl3 <sup>ii</sup> | 180.00 (7)  | O3 <sup>iii</sup> —Cd2—Cl3               | 93.93 (14)  |
| O3 <sup>i</sup> —Cd2—Cl3  | 86.07 (14)  | O3 <sup>iii</sup> —Cd2—Cl3 <sup>ii</sup> | 86.07 (14)  |

Symmetry code: (i)  $-x+3/2, y+1/2, -z+3/2$ ; (ii)  $-x+1, -y+1, -z+1$ ; (iii)  $x-1/2, -y+1/2, z-1/2$ ; (iv)  $x+1/2, -y+1/2, z-1/2$ ; (v)  $-x+1/2, y+1/2, -z+3/2$ ;

**Table S2.** Selected hydrogen bond distances (Å) and angles (°) in the complex **1**, **2** and **3**.

| D-H--A                                                                                                   | D-H     | H---A    | D---A    | D-H--A   |
|----------------------------------------------------------------------------------------------------------|---------|----------|----------|----------|
| <b>Complex 1</b>                                                                                         |         |          |          |          |
| N(2)-H(2)---O(2) <sup>i</sup>                                                                            | 0.86    | 1.96     | 2.785(6) | 162.0    |
| O(3)-H(3A)---O(1) <sup>ii</sup>                                                                          | 0.85(9) | 1.95(10) | 2.746(6) | 156.0(9) |
| O(3)-H(3B)---O(1) <sup>iii</sup>                                                                         | 0.86(5) | 1.90(5)  | 2.724(6) | 161.0(7) |
| O(4)-H(4D)---O(2) <sup>iii</sup>                                                                         | 0.89    | 2.19     | 2.992(8) | 150.0    |
| O(4)-H(4E)---O(1) <sup>iv</sup>                                                                          | 0.89    | 1.85     | 2.701(7) | 160.0    |
| Symmetry code: (i) $-1+x, y, z$ ; (ii) $-1+x, y, -1+z$ ; (iii) $1-x, -y, -z$ ; (iv) $-1+x, -1+y, -1+z$ ; |         |          |          |          |
| <b>Complex 2</b>                                                                                         |         |          |          |          |
| O(1)-H(1W)---Cl(1) <sup>i</sup>                                                                          | 0.90    | 2.17     | 2.975(4) | 149.0    |
| N(2)-H(2A)---Cl(1) <sup>ii</sup>                                                                         | 0.86    | 2.37     | 3.206(5) | 165.0    |
| O(3)-H(3A)---Cl(1) <sup>iii</sup>                                                                        | 1.07    | 1.99     | 3.058(5) | 173.0    |
| O(3)-H(3B)---Cl(1) <sup>ii</sup>                                                                         | 0.97    | 2.69     | 3.634(5) | 165.0    |
| C(3)-H(3)---O(2) <sup>iv</sup>                                                                           | 0.93    | 2.46     | 3.331(9) | 157.0    |

Symmetry code: (i)  $1+x, y, 1+z$ ; (ii)  $1+x, y, z$ ; (iii)  $1-x, -y, 1-z$ ; (iv)  $1-x, -y, 2-z$ ;

---

**Complex 3**

|                                  |      |      |           |       |
|----------------------------------|------|------|-----------|-------|
| N(2)-H(2)---Cl(3) <sup>i</sup>   | 0.87 | 2.50 | 3.257(6)  | 145.0 |
| O(5)-H(5A)---O(2) <sup>ii</sup>  | 0.89 | 2.08 | 2.789(8)  | 136.0 |
| O(5)-H(5B)---O(6) <sup>iii</sup> | 0.88 | 2.45 | 2.797(14) | 104.0 |
| O(6)-H(6A)---O(1) <sup>i</sup>   | 0.85 | 1.98 | 2.829(14) | 172.0 |
| O(6)-H(6B)---O(5) <sup>iv</sup>  | 0.85 | 2.46 | 2.797(14) | 105.0 |
| C(5)-H(5C)---O(6)                | 0.96 | 2.39 | 3.199(14) | 141.0 |

Symmetry code: (i)  $-1/2+x, 1/2-y, 1/2+z$ ; (ii)  $2-x, -y, 1-z$ ; (iii)  $1+x, y, z$ ; (iv)  $-1+x, y, z$ ;

---

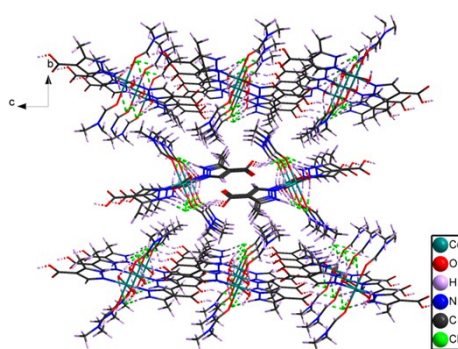

**Fig. S2.** 3D grids of complex 2. (Dashed lines represent hydrogen bonds)

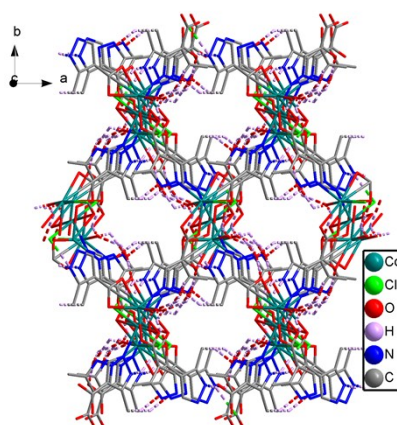

**Fig. S3.** 3D grids of complex 3. (Dashed lines represent hydrogen bonds)

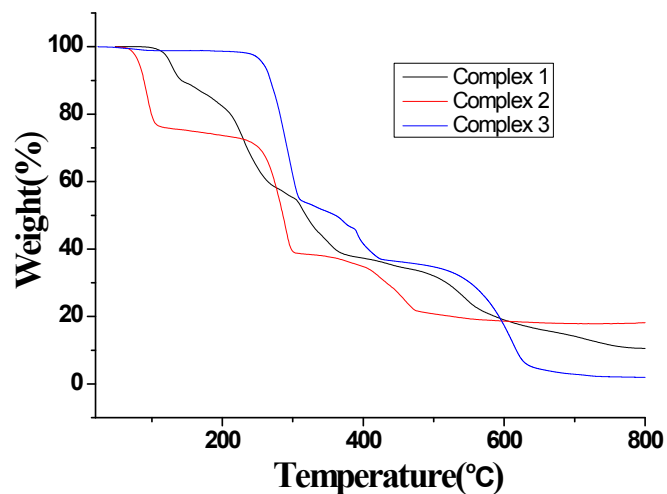

Fig. S4. TG curves of complexes 1-3

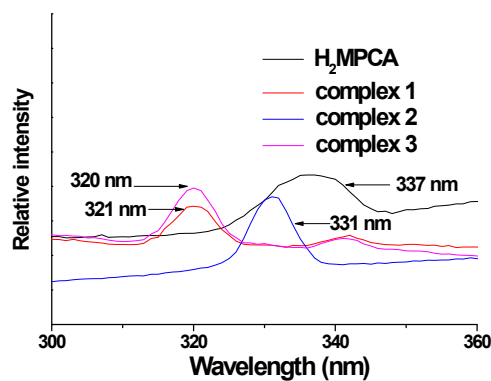

Fig. S5. The excitation spectra of H<sub>2</sub>MPCA, complex 1, 2 and 3 in the solid state at room temperature

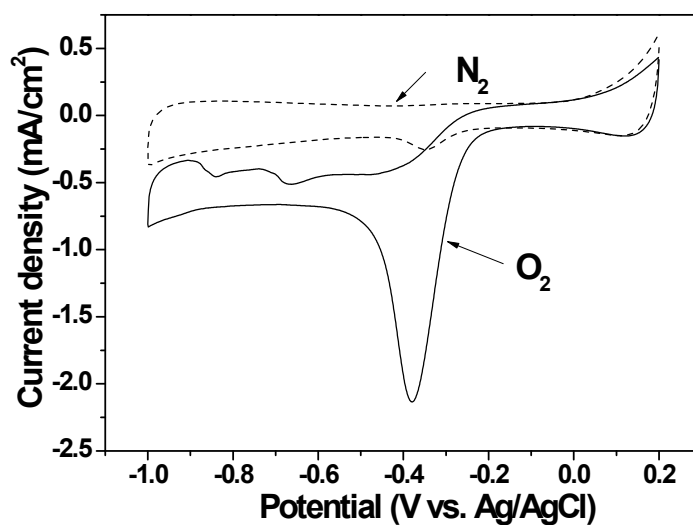

Fig. S6. CVs in N<sub>2</sub>-saturated (dotted curve) and O<sub>2</sub>-saturated (solid curve) 0.1M KOH. Scan rate, 50 mV s<sup>-1</sup>.

## The electrode transfer number for ORR using complex 2 as electrocatalyst

Often, the electrode transfer number was obtained using the Koutecky-Levich (K-L) equation, the process is as follows:

$$\frac{1}{j} = \frac{1}{j_k} + \frac{1}{j_d} + \frac{1}{j_f} \quad (1)$$

$$\frac{1}{j} = \frac{1}{j_k} + \frac{1}{j_d} \quad (2)$$

$$j_d = 0.62nFD^{2/3}C_0\nu^{-1/6}\omega^{1/2} \quad (3)$$

$$j_k = nFkC_0 \quad (4)$$

$j$  was current density,  $j_k$  and  $j_d$  were dynamic current density and limiting diffusion current density, respectively,  $j_f$  was diffusion current density through Nafion,  $n$  was the electrode transfer number of every  $O_2$ ,  $k$  was rate constant of ORR,  $F$  was Faraday constant (96485 C/mol),  $\omega$  was the angular velocity of rotating disk electrode ( $\omega = 2\pi N$ ,  $N$  was rotate speed),  $C_0$  was the concentration of  $O_2$  in the electrolyte, (0.1 M KOH,  $1.2 \times 10^{-3}$  mol/L),  $D$  was diffusion coefficient of  $O_2$  in the electrolyte, (0.1 M KOH,  $1.9 \times 10^{-5}$  cm/s),  $\nu$  was viscous drag coefficient in the electrolyte (0.1 M KOH,  $0.1$  m<sup>2</sup>/s).

The impedance could be ignored owing to the thickness of Nafion membrane in adhesive electrode was too small. So the equation (1) was approximately equal to equation (2).

In alkaline electrolyte, there are two electron transfer way for ORR:

(i) Direct 4 electron transfer process:

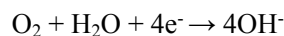

(ii) Indirect 2 electron transfer process:

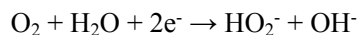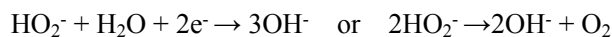

Through calculation, the average electron transfer was 3.37 in the ORR with complex 2 as electrocatalyst.

The current density was normalized to the geometrical surface area and the measured

potentials vs. Ag/AgCl were converted to a reversible hydrogen electrode (RHE) scale according to the Nernst equation ( $E_{\text{RHE}} = E_{\text{Ag/AgCl}} + 0.059 \times \text{pH} + 0.205$ )

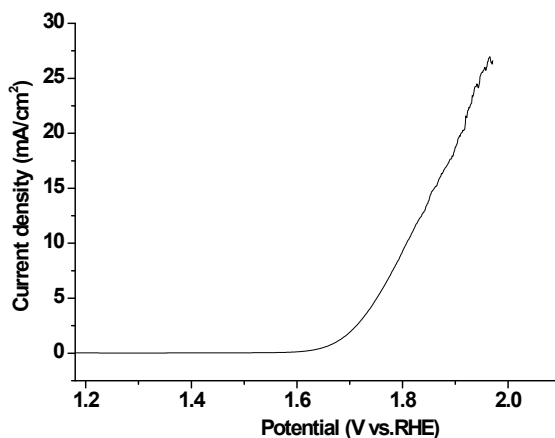

**Fig. S7.** OER polarization curve for complex 2

For rotating ring-disk electrode (RRDE) measurements, a rotating ring disk electrode with a glassy carbon disk (5 mm in diameter) was used (Pine Instruments, model: AFMSRCE). The ring potential was constantly set at 0.5 V vs Ag/AgCl. The electron transfer number ( $n$ ) and the percentage of  $\text{H}_2\text{O}_2$  produced during the catalyzed ORR can be determined by the following equations:

$$n = 4 \frac{I_d}{I_d + I_r/N} \quad (1)$$

$$\text{mol}\% \text{H}_2\text{O}_2 = 100 \left( \frac{I_r}{I_d/N} \right) \quad (2)$$

where  $I_d$  was the disk current,  $I_r$  was the ring current, and  $N$  was the collection efficiency of the ring electrode that was determined to be 0.4 of our electrode.

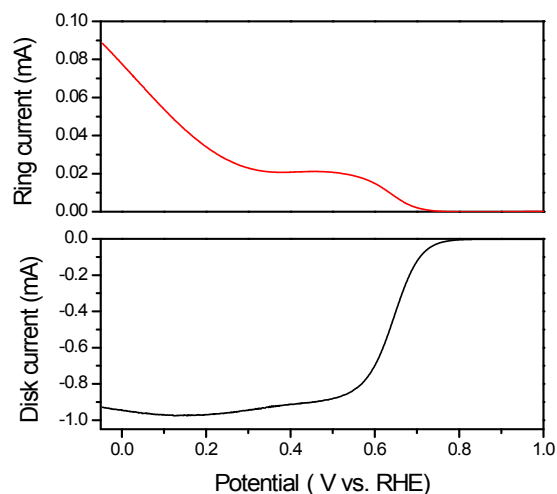

**Fig. S8.** Rotating ring-disk electrode (RRDE) curves of complex **2** in O<sub>2</sub>-saturated 0.1MKOH. All the scanning rates were 50 mV/s.

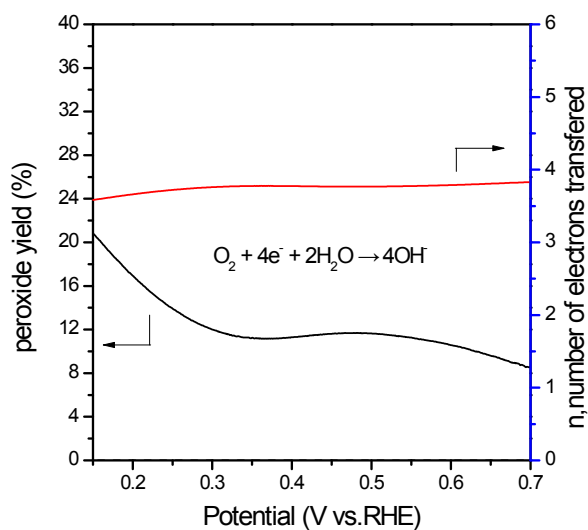

**Fig. S9.** Electron transfer numbers for the ORR catalyzed complex **2** and the corresponding % H<sub>2</sub>O<sub>2</sub> produced. Data obtained using rotating ring -disk electrode.



**Table S3.** Comparison of the OER activity for several active catalysts supported on different substrates

| catalyst                                         | Overpotential @ 10 mA cm <sup>-2</sup> (mV) | Catalyst loading (mg cm <sup>-2</sup> ) | Electrolyte | Substrate     | Ref.      |
|--------------------------------------------------|---------------------------------------------|-----------------------------------------|-------------|---------------|-----------|
| Complex 2                                        | 578                                         | 0.24                                    | 0.1M KOH    | Glassy carbon | This work |
| meso-Co <sub>3</sub> O <sub>4</sub>              | 426                                         | 0.1                                     | 0.1M KOH    | Glassy carbon | [S1]      |
| Co <sub>3</sub> O <sub>4</sub> C-NA              | 290                                         | ~0.2                                    | 0.1M KOH    | Cu foil       | [S2]      |
| Co <sub>3</sub> O <sub>4</sub> /N-doped graphene | 310                                         | 1.0                                     | 1M KOH      | Ni foam       | [S3]      |
| N-doped graphene-CoO                             | 340                                         | 0.7                                     | 1M KOH      | Glassy carbon | [S4]      |
| IrO <sub>2</sub> /C                              | 370                                         | 0.2                                     | 0.1M KOH    | Glassy carbon | [S5]      |
| CoO/CNT                                          | 550                                         | 0.05                                    | 1M KOH      | ITO           | [S6]      |
| Mesoporous Co <sub>3</sub> O <sub>4</sub>        | 525                                         | 0.13                                    | 0.1M KOH    | gold disk     | [S7]      |

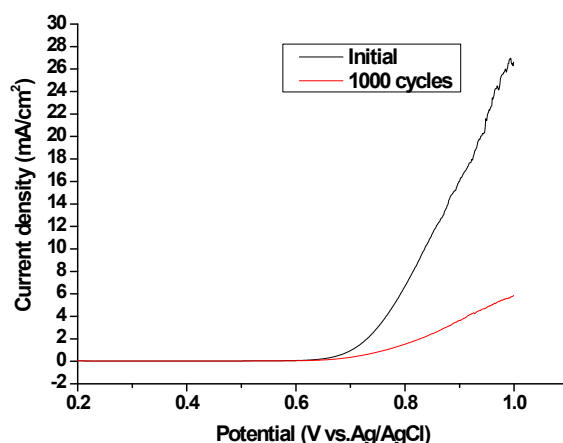

**Fig. S10.** OER stability test of complex 2 catalyst dispersed on glassy carbon electrode in 0.1M KOH electrolyte. Cycles were swept between 0.2 V and 1.0 V at 5 mV/s.

### References for Table S1

- [S1] Y. J. Sa, K. Kwon, J.Y. Cheon, F. Kleitzc and S. H. Joo, *J. Mater. Chem. A*, 2013, **1**, 9992–10001
- [S2] T. Y. Ma, S. Dai, M. Jaroniec and S. Z. Qiao, *J. Am. Chem. Soc.*, 2014, **136**, 13925–13931.
- [S3] Y. Liang, Y. Li, H. Wang, J. Zhou, J. Wang, T. Regier and H. Dai, *Nat. Mater.*, 2011, **10**, 780–786.
- [S4] S. Mao, Z. Wen, T. Huang, Y. Hou, J. Chen, *Energy Environ. Sci.* 2014, **7**, 609–616.
- [S5] Y. Zhao, R. Nakamura, K. Kamiya, S. Nakanishi, K. Has himoto, *Nat. Commun.* 2013, **4**, 2390.
- [S6] J. Wu, Y. Xue, X. Yan, W. Yan, Q. Cheng and Y. Xie, *Nano Res.*, 2012, **5**, 521–

530.

[S7] H. Tüysüz, Y. J. Hwang, S. B. Khan, A. M. Asiri and P. Yang, *Nano Res.*, 2013, **6**, 47–54.
